# Supplementary material
Source: MDPI journal article supplement (https://www.mdpi.com/1999-4907/11/4/466)
Supplement: s1 [file s1]

**Supplementary Materials:** The following are available online at [www.mdpi.com/xxx/s1](http://www.mdpi.com/xxx/s1), Figure S1. Contour and surface plots among mechanical properties (impact bending and compression parallel to grain) versus ATR-crystallinity., Figure S2. Contour and surface plots among physical properties (VS after 2 and 24 h immersion in distilled water) versus ATR-crystallinity (VS = volumetric swelling).

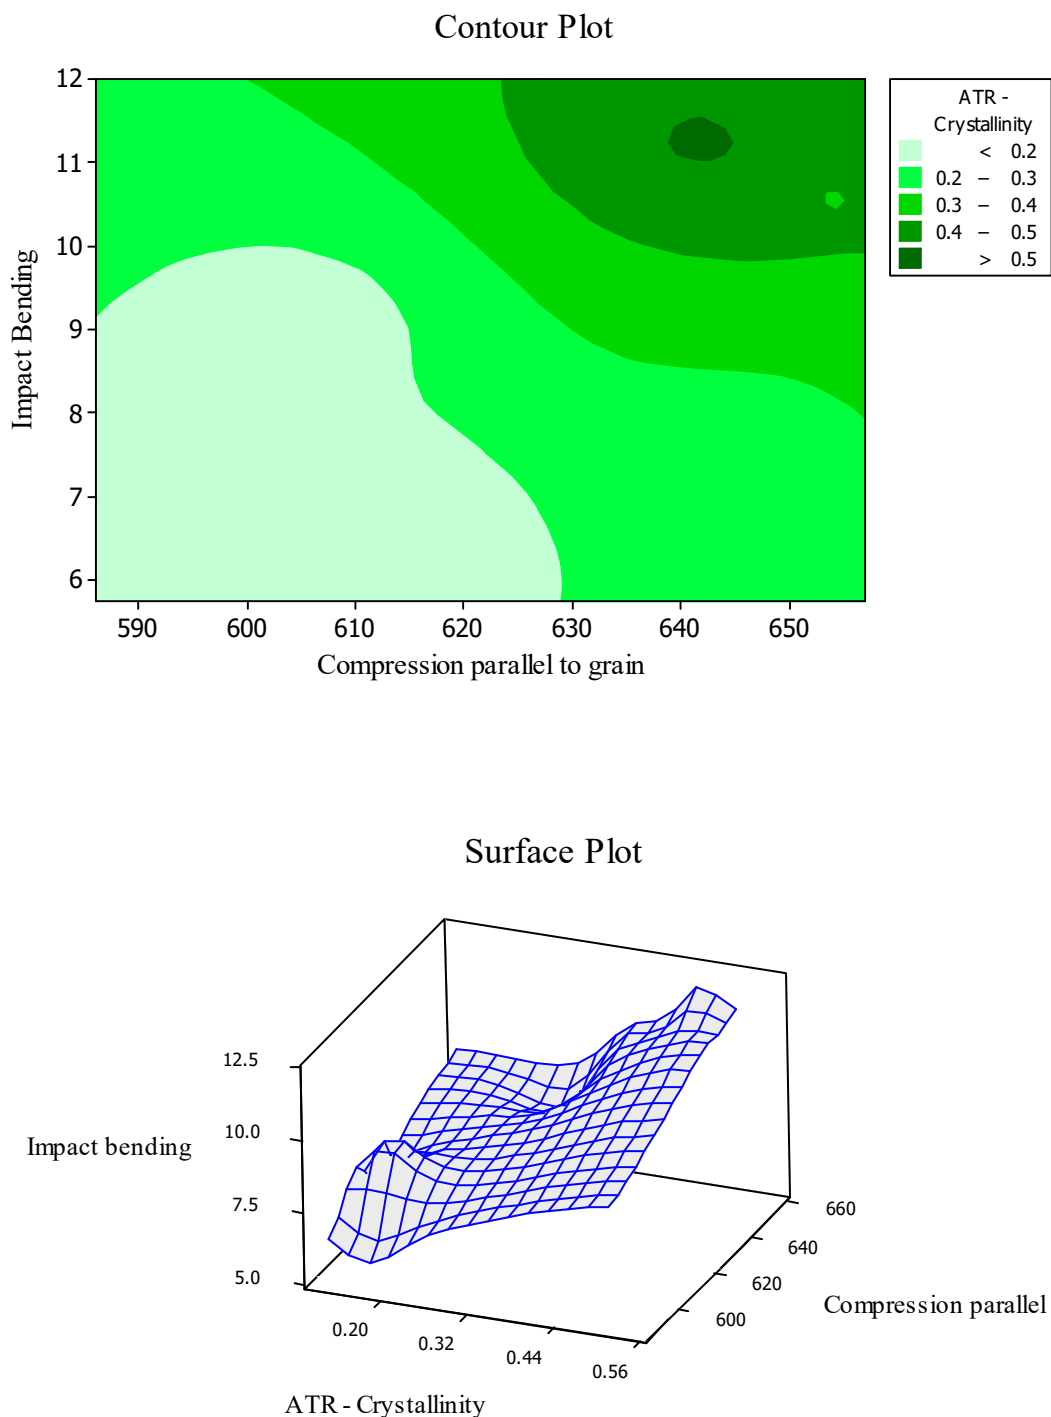

**Figure S1.** Contour and surface plots among mechanical properties (impact bending and compression parallel to grain) versus ATR-crystallinity.

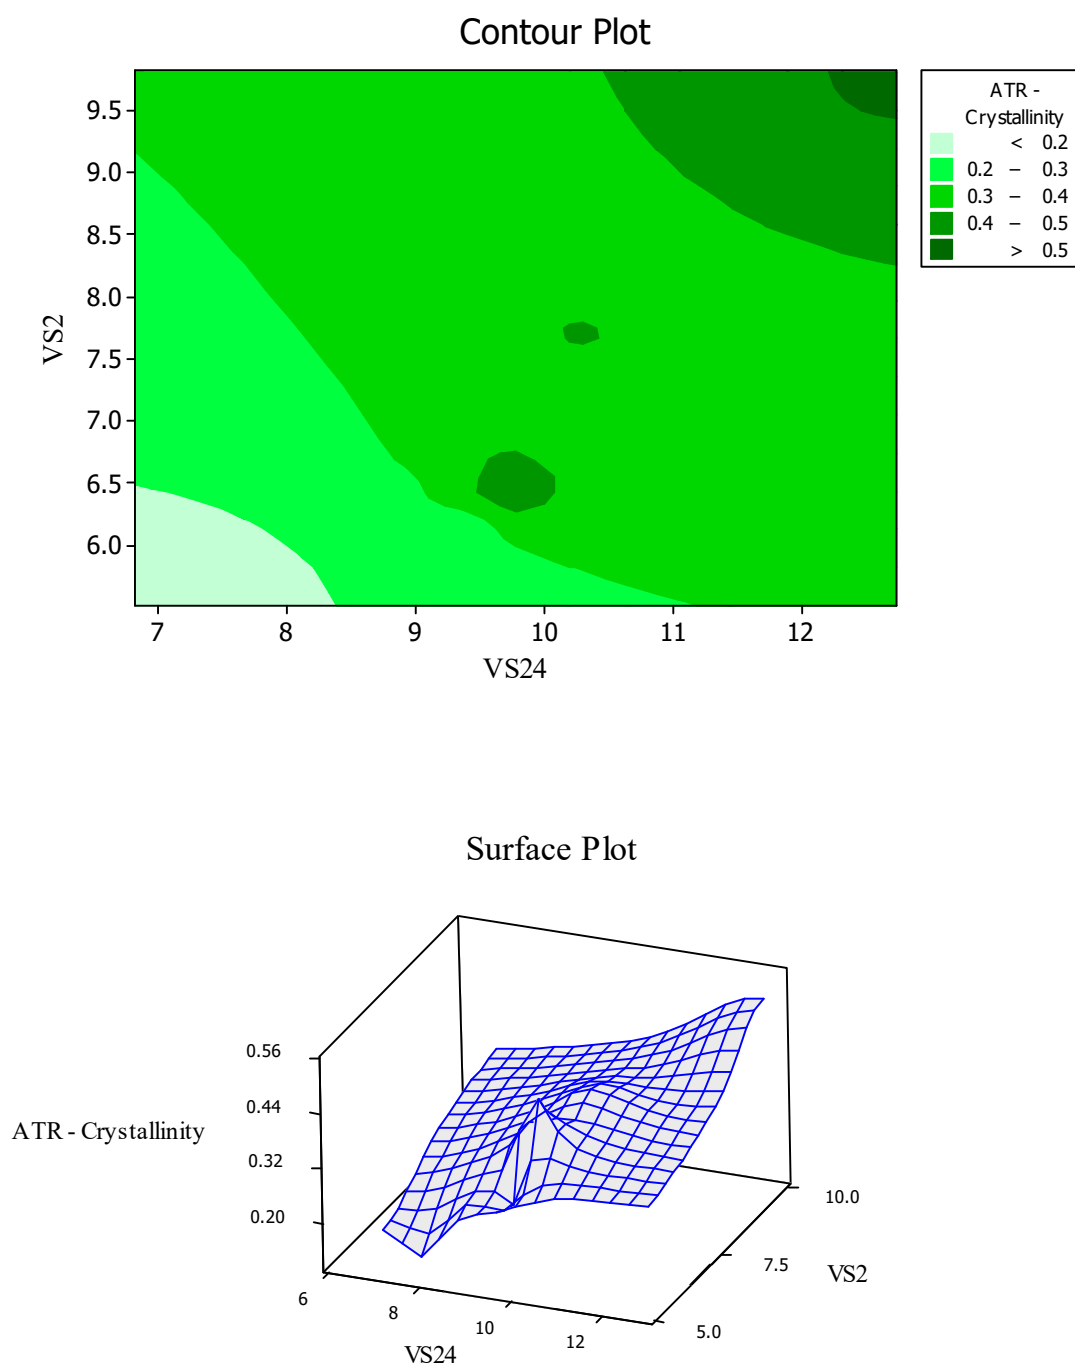

**Figure S2.** Contour and surface plots among physical properties (VS after 2 and 24 h immersion in distilled water) versus ATR-crystallinity (VS = volumetric swelling).
